# Supplementary material for: Identification of the Key Genes Involved in Proline-Mediated Modification of Cell Wall Components in Rice Seedlings under Trivalent Chromium Exposure
Source: MDPI journal article supplement (doi:10.3390/toxics12010004), 2023-12-19
Supplement: s1 [file s1]

**Table S1:** Sequence of forward and reverse primers used in gene expression analysis

| Enzyme                                    | Gene symbol | MSU ID           | Primer sequences(5'-3')                                | Amplicon size (bp) |
|-------------------------------------------|-------------|------------------|--------------------------------------------------------|--------------------|
| $\beta$ -glucosidase                      | OsBGLU3     | LOC_Os01g59840.1 | F-GCTTGGTTCTTCGTGGACAT<br>R-GTTGCCGCTTGCTCTTGA         | 151                |
|                                           | OsBGLU6     | LOC_Os03g11420.1 | F-GTGCTGCTCCACCTCTACTG<br>R-CTGGTGGGCTGTTGTACCTT       | 574                |
|                                           | OsBGLU18    | LOC_Os04g43410.1 | F-TTACACCGACGCAGAGGAT<br>R-CGAAGTAGCCACGAACATCA        | 116                |
|                                           | OsBGLU26    | LOC_Os07g46280.1 | F-GGAACCTGACACCGACCAGTT<br>R-GCACCATCGTCTATCGCCTTCT    | 298                |
|                                           | OsGH5BG     | LOC_Os10g22520.1 | F-TCCTCCTCTTCCTCCTCCTCT<br>R-CTGCGTCACCGACTTGAATTG     | 221                |
| $\beta$ -amylase                          | OsBMY1      | LOC_Os07g35880.1 | F-CAGGACTGCCATCCAGTTGT<br>R-CGAGGCCAACCTCTATGTCC       | 104                |
|                                           | OsBMY6      | LOC_Os10g41550.1 | F-GGTGTTGGAGGAGATGAAGTC<br>R-GAGGTAGCCGCAGAATGTG       | 178                |
| Xyloglucan endotransglucosylase/hydrolase | OsXTH6      | LOC_Os04g51450.1 | F-GGTCGGCGTTCAAGTCCAAGAC<br>R-TCGTCTGTTGGGTGTTCCAATCCT | 136                |
|                                           | OsXTH9      | LOC_Os04g51460.1 | F-GTTCCAGTCCAAGAGCGAGTA<br>R-CTGCGACGACAAGTAGAAGGT     | 106                |
|                                           | OsXTH11     | LOC_Os06g48160.1 | F-GTCGTTGCCTTCTACCTGTC<br>R-AGAGGACGGAGTAGCGATG        | 205                |
|                                           | OsXTH23     | LOC_Os02g46910.1 | F-CCGCTACTTCACCGAGACCTT<br>R-CGGCGAACACCAGCAAGAAC      | 227                |
| Galacturonosyltransferase                 | OsGATL6     | LOC_Os02g50600.1 | F-TGGCAGCGGTTTCATTCATC<br>R-TTAGCAAGCACAGCAGACTC       | 229                |
| Fucosyltransferase                        | OsFUT11     | LOC_Os08g36840.1 | F-GACCGCAACCTCATCATCC<br>R-CCTTGTTTCATCCACTTCTCCTT     | 274                |
| Phenylalanine ammonia-lyase               | OsPAL2      | LOC_Os02g41650.1 | F-ATGAAGCCGAAGCAGGACAG<br>R-GGAGATGAGACCAAGCGAGTT      | 462                |
|                                           | OsPAL6      | LOC_Os04g43800.1 | F-CTCTGCTCCAGGGGTACTCT<br>R-GCTTCTTCGCCAGCATCATG       | 513                |

|                                                 |                 |                  |                                                      |     |
|-------------------------------------------------|-----------------|------------------|------------------------------------------------------|-----|
|                                                 | OsPAL7          | LOC_Os05g35290.1 | F-CACATCTTGGAAGGCAG<br>R-GAGAGGTTGGAGGGCAG           | 365 |
| 4-coumarate: CoA<br>ligase                      | Os4CL1          | LOC_Os08g14760.1 | F-AGGACGACGAGAAGGTGTT<br>R-ATGGTGTGAGCGAGTAGATG      | 217 |
|                                                 | Os4CL5          | LOC_Os08g34790.1 | F-CTCCACTCCATCCTCCTCTG<br>R-CGATGTCCTGAAGCTCCTTG     | 238 |
| Peroxidase                                      | OsPRX77         | LOC_Os06g16350.1 | F-GCTCTGATGCTTCGTCTTC<br>R-CATTCTGTTCTGCCTTCTTCT     | 112 |
|                                                 | OsPRX109        | LOC_Os07g47990.1 | F-GCGTCACTGCTCAGGCTTCACT<br>R-CCTCGACCTGCGCCTTGATGTT | 166 |
| Pectinesterase                                  | OsPME3          | LOC_Os01g21034.1 | F-ACTCGAACAAGAGGTACGTG<br>R-CCGAAGATGAAGTCGATGGT     | 388 |
|                                                 | OsPME7          | LOC_Os01g65790.1 | F-CGCTCAAGACGCTCTACTACG<br>R-GGTATCCACTTGTACCCCTGT   | 154 |
|                                                 | OsPME23         | LOC_Os07g49100.1 | F-ACGTGAACATGATAGGCGAC<br>R-CTGAAGAACAACCTGCGAGT     | 332 |
| Polygalacturonase<br>s                          | OsPGL7          | LOC_Os01g66710.1 | F-GAACGTGACGGTGAAGACGA<br>R-GTGGAGTCCGAGAACGTGAC     | 114 |
|                                                 | OsPGL9          | LOC_Os05g46510.1 | F-TCCGTGATGCGGCTGGTTGTTG<br>R-GCCTGCGTGTCGTTGGTAATGC | 140 |
| Pectate lyase                                   | OsPLL1          | LOC_Os01g36620.1 | F-CGTCCACCACTGCTTCTTC<br>R-TGAACACCGCCTTCCTCTC       | 185 |
|                                                 | OsPLL4          | LOC_Os04g05050.1 | F-GCAGGTCACGATAGCATTCA<br>R-ATGGTTGGCTCAGCACTTC      | 144 |
| Glyceraldehyde-3-<br>phosphate<br>dehydrogenase | <i>OsGAPDH1</i> | LOC_Os08g03290.1 | F-GACAGCAGGTCGAGCATCTTC<br>R-CAGGCGACAAGCTTGACAAAG   | 74  |

**Table S2:** Total number of DEGs detected in rice seedlings under the three effective concentrations of Cr with and without Pro treatment

| Cr treatments | Total number of DEGs | Up-regulated DEGs<br>(Roots/Shoots) | Down-regulated DEGS<br>(Roots/Shoots) |
|---------------|----------------------|-------------------------------------|---------------------------------------|
|               |                      |                                     |                                       |

|            |     |       |       |
|------------|-----|-------|-------|
| 12 mg Cr/L | 143 | 17/14 | 50/3  |
| 24 mg Cr/L | 106 | 20/14 | 69/3  |
| 40 mg Cr/L | 121 | 22/23 | 63/13 |

| Cr treatments with Proline application | Total number of DEGs | Up-regulated DEGs (Roots/Shoots) | Down-regulated DEGS (Roots/Shoots) |
|----------------------------------------|----------------------|----------------------------------|------------------------------------|
| 12 mg Cr/L                             | 106                  | 15/8                             | 56/27                              |
| 24 mg Cr/L                             | 107                  | 11/7                             | 65/24                              |
| 40 mg Cr/L                             | 140                  | 31/26                            | 61/22                              |
